# Supplementary material
Source: PubMed Central journal article supplement (PMC6639122)
Supplement: NIHMS1032575-supplement-Supplemental.pdf [file NIHMS1032575-supplement-Supplemental.pdf]

# THE LANCET HIV

## Supplementary appendix

This appendix formed part of the original submission and has been peer reviewed. We post it as supplied by the authors.

Supplement to: W Z, Tang Z, Mao Y, et al. Testing and linkage to HIV care in China: a cluster-randomised trial. *Lancet HIV* 2017; published online August 31. [http://dx.doi.org/10.1016/S2352-3018\(17\)30131-5](http://dx.doi.org/10.1016/S2352-3018(17)30131-5).

## APPENDIX

### Testing and Linkage to HIV Care in China: A Cluster-Randomized Trial

**S1 Table. Study hospital characteristics compared between the One4All intervention (n=6 hospitals) and SOC control (n=6 hospitals) arms, Guangxi, China, 2013.**

| Characteristics                                          | One4All<br>(N=6)  | SOC<br>(N=6)     | <i>p</i> -Value <sup>a</sup> |
|----------------------------------------------------------|-------------------|------------------|------------------------------|
| Number of beds                                           |                   |                  |                              |
| Mean (SD)                                                | 688 (416)         | 423 (106)        | 0.16                         |
| Median                                                   | 585               | 386              |                              |
| Minimum–Maximum                                          | 300–1,500         | 318–600          |                              |
| Number of personnel                                      |                   |                  |                              |
| Mean (SD)                                                | 719 (292)         | 583 (56)         | 0.29                         |
| Median                                                   | 695               | 578              |                              |
| Minimum–Maximum                                          | 370–1,200         | 507–663          |                              |
| Number of outpatients in 2012                            |                   |                  |                              |
| Mean (SD)                                                | 367,911 (175,613) | 266,626 (49,391) | 0.20                         |
| Median                                                   | 407,221           | 268,573          |                              |
| Minimum–Maximum                                          | 137,243–632,700   | 187,254–331,294  |                              |
| Number of discharged patients in 2012                    |                   |                  |                              |
| Mean (SD)                                                | 28,750 (13,357)   | 20,736 (4,672)   | 0.20                         |
| Median                                                   | 24,961            | 19,463           |                              |
| Minimum–Maximum                                          | 13,891–52,000     | 16,143–26,451    |                              |
| Number of outpatients from January to June 2013          |                   |                  |                              |
| Mean (SD)                                                | 164,031 (114,167) | 143,774 (30,098) | 0.68                         |
| Median                                                   | 166,270           | 148,783          |                              |
| Minimum–Maximum                                          | 25,280–329,600    | 96,381–174,122   |                              |
| Number of doctors                                        |                   |                  |                              |
| Mean (SD)                                                | 218 (83)          | 155 (56)         | 0.15                         |
| Median                                                   | 213               | 133              |                              |
| Minimum–Maximum                                          | 122–320           | 114–262          |                              |
| Number of nurses                                         |                   |                  |                              |
| Mean (SD)                                                | 317 (134)         | 247 (21)         | 0.23                         |
| Median                                                   | 291               | 242              |                              |
| Minimum–Maximum                                          | 173–554           | 225–285          |                              |
| Number of pharmacists                                    |                   |                  |                              |
| Mean (SD)                                                | 75 (77)           | 25 (5)           | 0.14                         |
| Median                                                   | 52                | 26               |                              |
| Minimum–Maximum                                          | 19–226            | 19–31            |                              |
| Number of laboratory personnel                           |                   |                  |                              |
| Mean (SD)                                                | 22 (6)            | 21 (4)           | 0.73                         |
| Median                                                   | 21                | 21               |                              |
| Minimum–Maximum                                          | 17–32             | 17–27            |                              |
| Number of other professional personnel                   |                   |                  |                              |
| Mean (SD)                                                | 8 (15)            | 36 (44)          | 0.16                         |
| Median                                                   | 0                 | 18               |                              |
| Minimum–Maximum                                          | 0–37              | 0–97             |                              |
| Number of beds for HIV/AIDS care                         |                   |                  |                              |
| Mean (SD)                                                | 14 (13)           | 15 (10)          | 0.90                         |
| Median                                                   | 13                | 14               |                              |
| Minimum–Maximum                                          | 0–30              | 0–25             |                              |
| Number of doctors for HIV/AIDS care                      |                   |                  |                              |
| Mean (SD)                                                | 2 (2)             | 3 (2)            | 0.71                         |
| Median                                                   | 2                 | 2                |                              |
| Minimum–Maximum                                          | 1–5               | 1–5              |                              |
| Number of nurses for HIV/AIDS care                       |                   |                  |                              |
| Mean (SD)                                                | 3 (3)             | 4 (4)            | 0.70                         |
| Median                                                   | 2                 | 2                |                              |
| Minimum–Maximum                                          | 1–10              | 1–10             |                              |
| Number of laboratory personnel for HIV/AIDS care         |                   |                  |                              |
| Mean (SD)                                                | 3 (2)             | 0 (0)            | 0.002                        |
| Median                                                   | 4                 | 0                |                              |
| Minimum–Maximum                                          | 0–5               | 0–1              |                              |
| Number of other professional personnel for HIV/AIDS care |                   |                  |                              |

|                                                                                                                                                                               |             |             |      |
|-------------------------------------------------------------------------------------------------------------------------------------------------------------------------------|-------------|-------------|------|
| Mean (SD)                                                                                                                                                                     | 1 (1)       | 0 (0)       | 0.54 |
| Median                                                                                                                                                                        | 0           | 0           |      |
| Minimum–Maximum                                                                                                                                                               | 0–3         | 0–1         |      |
| Duration between initial HIV screening and receipt of all of the following: WB, CD4 testing and counselling; under SOC in the 6 months prior to the start of the study (days) |             |             |      |
| Mean (SD)                                                                                                                                                                     | 40 (11)     | 43 (17)     | 0.75 |
| Median                                                                                                                                                                        | 40          | 41          |      |
| Minimum–Maximum                                                                                                                                                               | 28–59       | 22–69       |      |
| Proportion of patients who receive WB, CD4, and counselling within 30 days of screening HIV-reactive                                                                          |             |             |      |
| Mean (SD)                                                                                                                                                                     | 19.5 (14.9) | 19.6 (14.1) | 0.99 |
| Median                                                                                                                                                                        | 12.1        | 15.2        |      |
| Minimum–Maximum                                                                                                                                                               | 6.1–43.8    | 5.1–43.3    |      |
| Proportion of patients who initiate ART within 90 days of screening HIV-reactive                                                                                              |             |             |      |
| Mean (SD)                                                                                                                                                                     | 14.1 (7.4)  | 16.1 (7.9)  | 0.67 |
| Median                                                                                                                                                                        | 13.3        | 17.7        |      |
| Minimum–Maximum                                                                                                                                                               | 5.6–27.3    | 2.6–24.1    |      |

One4All=One4All intervention arm, SOC=standard of care control arm, SD=standard deviation, HIV=human immunodeficiency virus, AIDS=acquired immune deficiency syndrome, WB=Western blot, ART=antiretroviral therapy;  
<sup>a</sup>p-values were calculated using t test

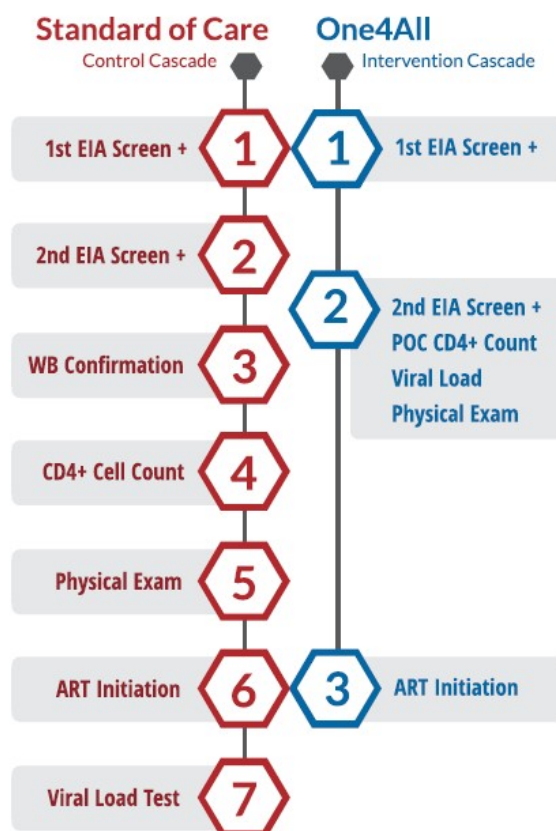

**F1 Figure. Diagram depicting differences in the HIV care cascade between control (standard of care [SOC], n=246, red) and intervention (One4All strategy, n=232, blue) study arms, Guangxi, China, 2014–2016. SOC Steps 2, 3, 4, 5, and 7 are all consolidated into a single One4All Step 2. This figure has been adapted with permission from Mao and colleagues.<sup>7</sup>**

**S2 Table. Participant self-reported risk behaviors at baseline compared between the One4All (intervention, n=232) and SOC (control, n=246) arms, Guangxi, China, 2014–2016.**

| Characteristics                                                                                                            | One4All<br>(N=232) | SOC<br>(N=246) | p-Value |
|----------------------------------------------------------------------------------------------------------------------------|--------------------|----------------|---------|
| Consistent condom use in the previous 3 months <sup>a</sup>                                                                |                    |                |         |
| No sexual behavior                                                                                                         | 152 (65.5%)        | 164 (66.7%)    | 0.73    |
| No (not consistently using condoms)                                                                                        | 73 (31.5%)         | 78 (31.7%)     |         |
| Yes                                                                                                                        | 7 (3.0%)           | 4 (1.6%)       |         |
| Number of sexual partners in the previous 3 months <sup>b</sup><br>(only among those not consistently using condoms)       |                    |                |         |
| 1 to 4                                                                                                                     | 73 (100.0%)        | 71 (91.0%)     | 0.06    |
| 5 or more                                                                                                                  | 0 (0.0%)           | 7 (9.0%)       |         |
| Number of times using illegal drugs or prescription drugs for non-medical reasons<br>in the previous 3 months <sup>c</sup> |                    |                |         |
| 0                                                                                                                          | 227 (97.8%)        | 245 (99.6%)    |         |
| 1 to 9                                                                                                                     | 2 (0.9%)           | 0 (0.0%)       |         |
| 10 to 19                                                                                                                   | 1 (0.4%)           | 1 (0.4%)       |         |
| 20 or more                                                                                                                 | 2 (0.9%)           | 0 (0.0%)       |         |
| Shared drug injecting equipment in the previous 3 months <sup>c</sup>                                                      |                    |                |         |
| No drug injecting                                                                                                          | 227 (97.8%)        | 245 (99.6%)    |         |
| No (did not share)                                                                                                         | 5 (2.2%)           | 1 (0.4%)       |         |

One4All=One4All intervention arm, SOC=standard of care control arm;

<sup>a</sup> Adjusted *p*-value was calculated by referring observed chi-square to distribution of chi-square values obtained by randomly permuting observed treatments over hospitals. More specifically, it is the proportion of “permuted” chi-square values at least as large as observed;

<sup>b</sup> *p*-value was calculated from adjusted chi-square test;

<sup>c</sup> Statistical test and *p*-value were not generated due to the very low numbers of drug users in both arms

**S3 Table. MedDRA-coded causes of post-enrollment deaths for the One4All (intervention, n=232) and SOC (control, n=246) study arms and overall (N=478), Guangxi, China, 2014–2016.**

| System Organ Class/<br>Preferred Term <sup>a</sup>                                  | One4all<br>(N=232) | SOC<br>(N=246)    | Overall<br>(N=478) |
|-------------------------------------------------------------------------------------|--------------------|-------------------|--------------------|
| Known Cause of Death                                                                | 61 (26.3%)         | 93 (37.8%)        | 154 (32.2%)        |
| Unknown Cause of Death                                                              | 4 (1.7%)           | 22 (8.9%)         | 26 (5.4%)          |
| <b>Infections and infestations</b>                                                  | <b>24 (10.3%)</b>  | <b>37 (15.0%)</b> | <b>61 (12.8%)</b>  |
| Lung infection                                                                      | 6 (2.6%)           | 14 (5.7%)         | 20 (4.2%)          |
| Pneumonia                                                                           | 8 (3.4%)           | 2 (0.8%)          | 10 (2.1%)          |
| <i>Pneumocystis jirovecii</i> pneumonia                                             | 6 (2.6%)           | 1 (0.4%)          | 7 (1.5%)           |
| Acute HIV infection                                                                 | 1 (0.4%)           | 4 (1.6%)          | 5 (1.0%)           |
| Tuberculosis                                                                        | 1 (0.4%)           | 2 (0.8%)          | 3 (0.6%)           |
| Pneumonia bacterial                                                                 | 1 (0.4%)           | 2 (0.8%)          | 3 (0.6%)           |
| Acquired immunodeficiency syndrome                                                  | 0 (0.0%)           | 3 (1.2%)          | 3 (0.6%)           |
| Herpes virus infection                                                              | 0 (0.0%)           | 2 (0.8%)          | 2 (0.4%)           |
| Extrapulmonary tuberculosis                                                         | 0 (0.0%)           | 2 (0.8%)          | 2 (0.4%)           |
| Meningitis cryptococcal                                                             | 0 (0.0%)           | 1 (0.4%)          | 1 (0.2%)           |
| Meningitis                                                                          | 0 (0.0%)           | 1 (0.4%)          | 1 (0.2%)           |
| HIV wasting syndrome                                                                | 0 (0.0%)           | 1 (0.4%)          | 1 (0.2%)           |
| Candida infection                                                                   | 0 (0.0%)           | 1 (0.4%)          | 1 (0.2%)           |
| Septic shock                                                                        | 0 (0.0%)           | 1 (0.4%)          | 1 (0.2%)           |
| Penicilliosis                                                                       | 1 (0.4%)           | 0 (0.0%)          | 1 (0.2%)           |
| <b>Respiratory, thoracic and mediastinal disorders</b>                              | <b>16 (6.9%)</b>   | <b>20 (8.1%)</b>  | <b>36 (7.5%)</b>   |
| Respiratory disorder                                                                | 8 (3.4%)           | 11 (4.5%)         | 19 (4.0%)          |
| Respiratory failure                                                                 | 8 (3.4%)           | 7 (2.8%)          | 15 (3.1%)          |
| Lung disorder                                                                       | 0 (0.0%)           | 1 (0.4%)          | 1 (0.2%)           |
| Bronchitis chronic                                                                  | 0 (0.0%)           | 1 (0.4%)          | 1 (0.2%)           |
| <b>Neoplasms benign, malignant and unspecified<br/>(including cysts and polyps)</b> | <b>4 (1.7%)</b>    | <b>8 (3.3%)</b>   | <b>12 (2.5%)</b>   |
| Neoplasm malignant                                                                  | 1 (0.4%)           | 3 (1.2%)          | 4 (0.8%)           |
| Gastric cancer                                                                      | 0 (0.0%)           | 3 (1.2%)          | 3 (0.6%)           |
| Hepatic cancer                                                                      | 1 (0.4%)           | 1 (0.4%)          | 2 (0.4%)           |
| Neoplasm                                                                            | 1 (0.4%)           | 0 (0.0%)          | 1 (0.2%)           |

|                                                             |                 |                 |                  |
|-------------------------------------------------------------|-----------------|-----------------|------------------|
| Lung neoplasm malignant                                     | 0 (0·0%)        | 1 (0·4%)        | 1 (0·2%)         |
| Gastrointestinal carcinoma                                  | 1 (0·4%)        | 0 (0·0%)        | 1 (0·2%)         |
| <b>Cardiac disorders</b>                                    | <b>4 (1·7%)</b> | <b>7 (2·8%)</b> | <b>11 (2·3%)</b> |
| Cardiac failure congestive                                  | 0 (0·0%)        | 4 (1·6%)        | 4 (0·8%)         |
| Cardiopulmonary failure                                     | 2 (0·9%)        | 1 (0·4%)        | 3 (0·6%)         |
| Cardiac failure                                             | 2 (0·9%)        | 0 (0·0%)        | 2 (0·4%)         |
| Myocardial infarction                                       | 0 (0·0%)        | 1 (0·4%)        | 1 (0·2%)         |
| Cardiac disorder                                            | 0 (0·0%)        | 1 (0·4%)        | 1 (0·2%)         |
| <b>Gastrointestinal disorders</b>                           | <b>2 (0·9%)</b> | <b>8 (3·3%)</b> | <b>10 (2·1%)</b> |
| Gastrointestinal disorder                                   | 2 (0·9%)        | 4 (1·6%)        | 6 (1·3%)         |
| Impaired gastric emptying                                   | 0 (0·0%)        | 2 (0·8%)        | 2 (0·4%)         |
| Gastrointestinal haemorrhage                                | 0 (0·0%)        | 1 (0·4%)        | 1 (0·2%)         |
| Diarrhoea                                                   | 0 (0·0%)        | 1 (0·4%)        | 1 (0·2%)         |
| <b>Nervous system disorders</b>                             | <b>4 (1·7%)</b> | <b>5 (2·0%)</b> | <b>9 (1·9%)</b>  |
| Cerebrovascular disorder                                    | 4 (1·7%)        | 2 (0·8%)        | 6 (1·3%)         |
| Leukoencephalopathy                                         | 0 (0·0%)        | 1 (0·4%)        | 1 (0·2%)         |
| Hepatic encephalopathy                                      | 0 (0·0%)        | 1 (0·4%)        | 1 (0·2%)         |
| Cerebral infarction                                         | 0 (0·0%)        | 1 (0·4%)        | 1 (0·2%)         |
| <b>Hepatobiliary disorders</b>                              | <b>2 (0·9%)</b> | <b>2 (0·8%)</b> | <b>4 (0·8%)</b>  |
| Hepatic cirrhosis                                           | 2 (0·9%)        | 1 (0·4%)        | 3 (0·6%)         |
| Hepatorenal syndrome                                        | 0 (0·0%)        | 1 (0·4%)        | 1 (0·2%)         |
| <b>General disorders and administration site conditions</b> | <b>0 (0·0%)</b> | <b>4 (1·6%)</b> | <b>4 (0·8%)</b>  |
| Multi-organ failure                                         | 0 (0·0%)        | 3 (1·2%)        | 3 (0·6%)         |
| Sudden cardiac death                                        | 0 (0·0%)        | 1 (0·4%)        | 1 (0·2%)         |
| <b>Injury, poisoning and procedural complications</b>       | <b>2 (0·9%)</b> | <b>0 (0·0%)</b> | <b>2 (0·4%)</b>  |
| Road traffic accident                                       | 1 (0·4%)        | 0 (0·0%)        | 1 (0·2%)         |
| Overdose                                                    | 1 (0·4%)        | 0 (0·0%)        | 1 (0·2%)         |
| <b>Metabolism and nutrition disorders</b>                   | <b>1 (0·4%)</b> | <b>1 (0·4%)</b> | <b>2 (0·4%)</b>  |
| Malnutrition                                                | 0 (0·0%)        | 1 (0·4%)        | 1 (0·2%)         |
| Diabetes mellitus                                           | 1 (0·4%)        | 0 (0·0%)        | 1 (0·2%)         |
| <b>Endocrine disorders</b>                                  | <b>0 (0·0%)</b> | <b>1 (0·4%)</b> | <b>1 (0·2%)</b>  |
| Endocrine disorder                                          | 0 (0·0%)        | 1 (0·4%)        | 1 (0·2%)         |
| <b>Blood and lymphatic system disorders</b>                 | <b>1 (0·4%)</b> | <b>0 (0·0%)</b> | <b>1 (0·2%)</b>  |
| Anaemia                                                     | 1 (0·4%)        | 0 (0·0%)        | 1 (0·2%)         |
| <b>Renal and urinary disorders</b>                          | <b>1 (0·4%)</b> | <b>0 (0·0%)</b> | <b>1 (0·2%)</b>  |
| Diabetic nephropathy                                        | 1 (0·4%)        | 0 (0·0%)        | 1 (0·2%)         |

One4All=One4All intervention arm, SOC=standard of care control arm, HIV=human immunodeficiency virus;

<sup>a</sup>MedDRA version 17.0 or higher used.
